# Supplementary material
Source: PubMed Central journal article supplement (PMC6548675)

**A**

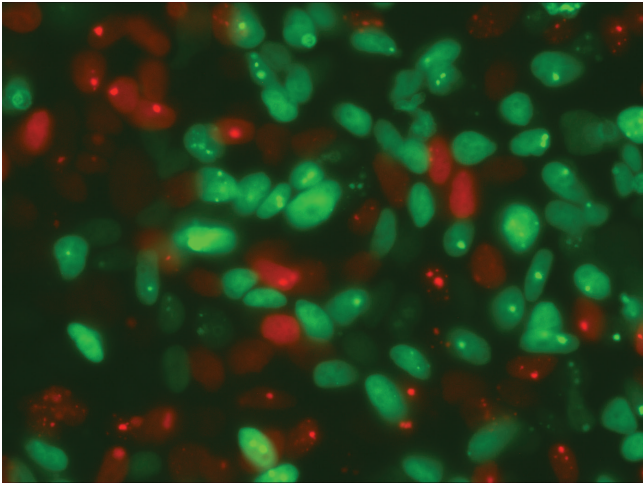

**B**

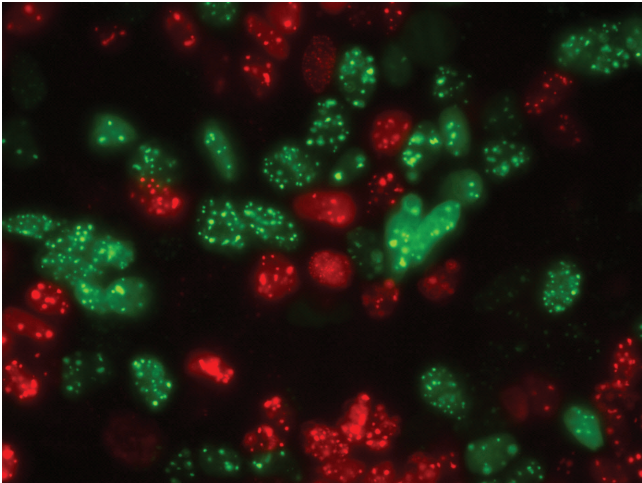

**C**

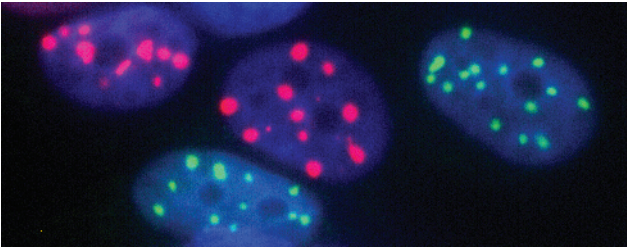

**A**

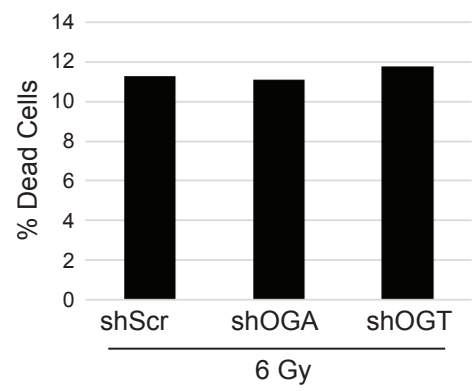

**B**

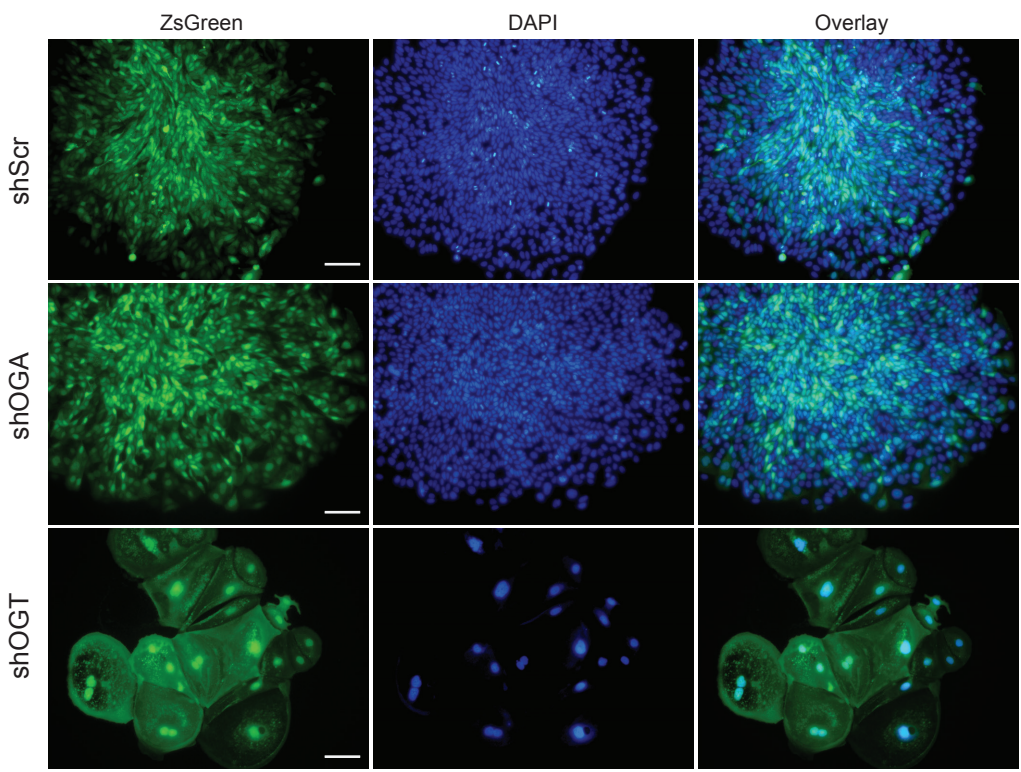

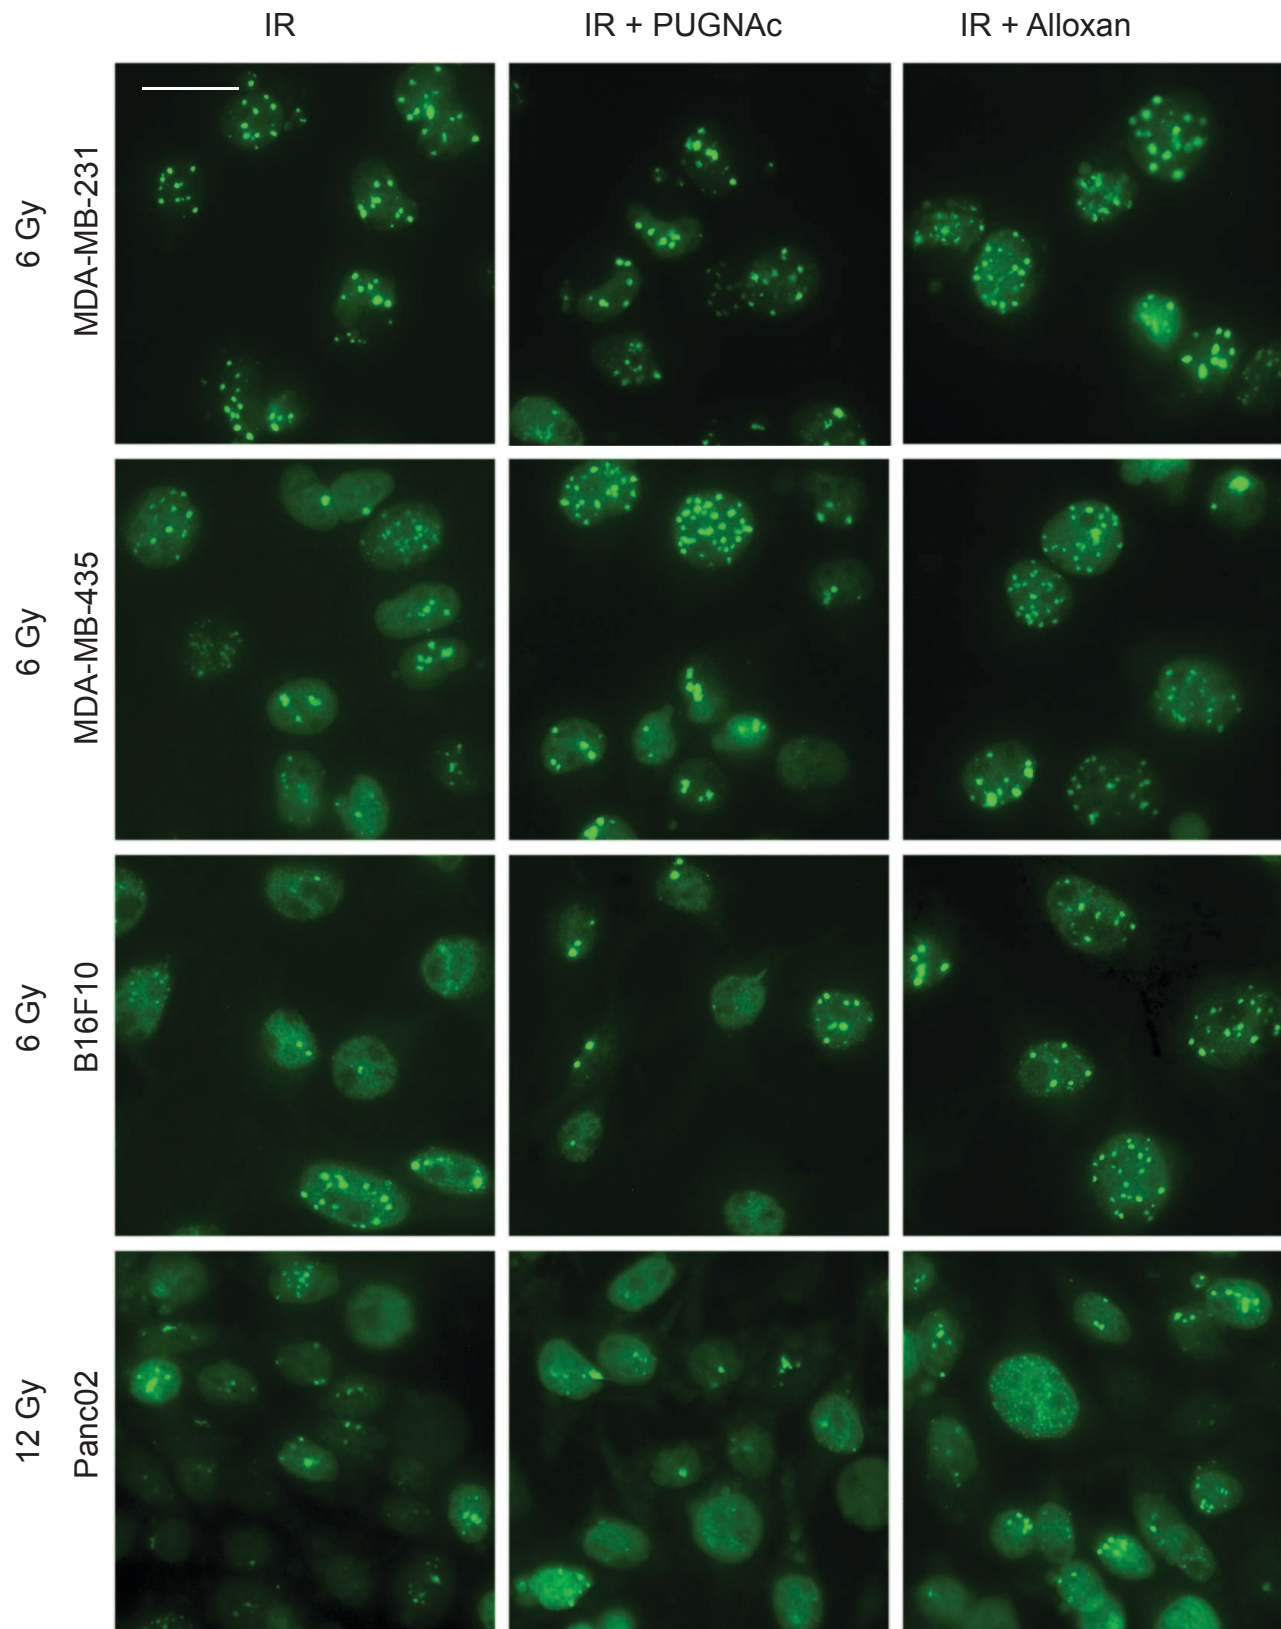

A

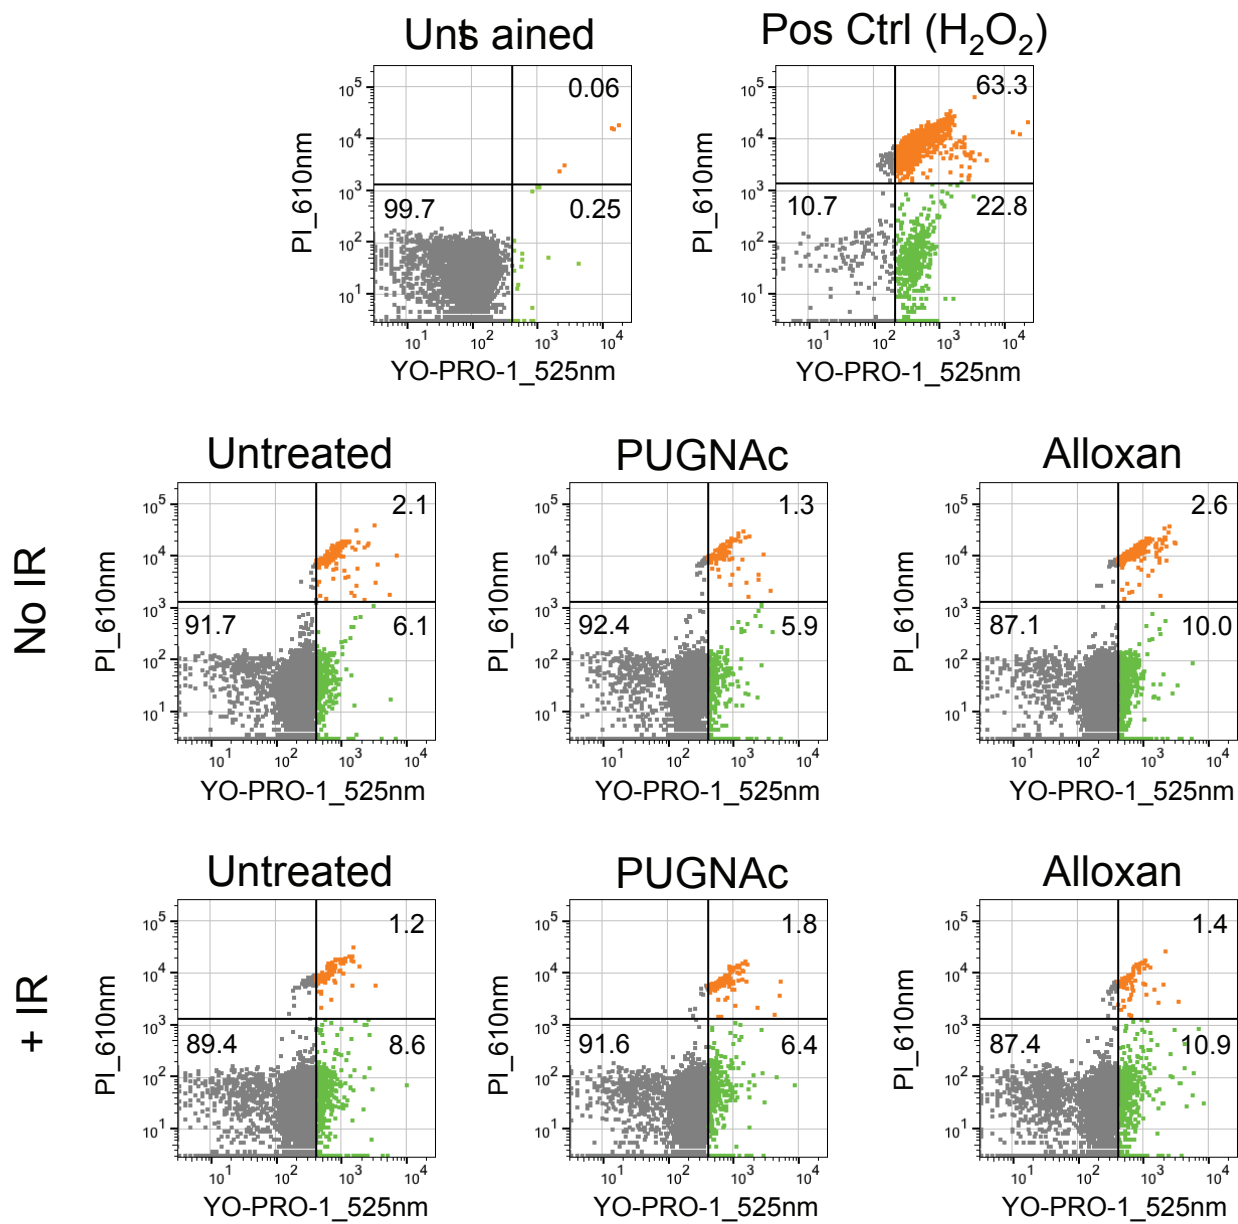

B

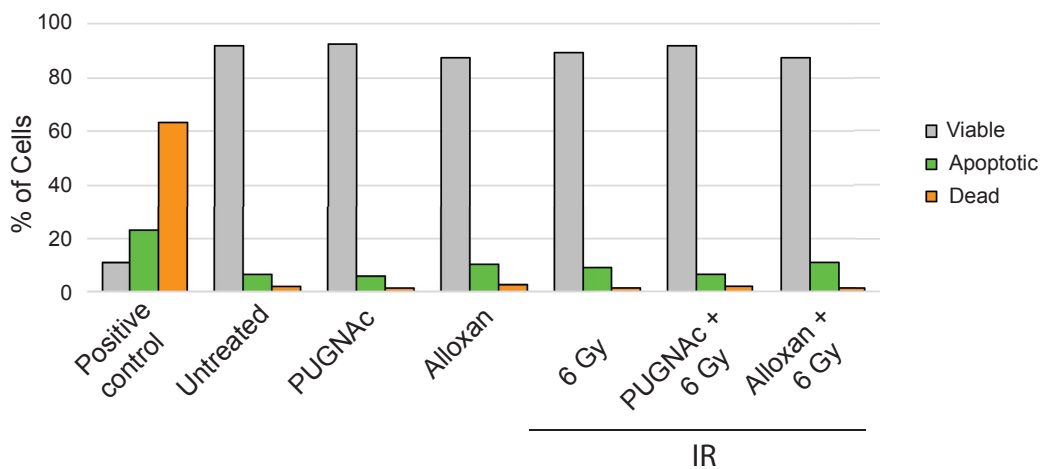

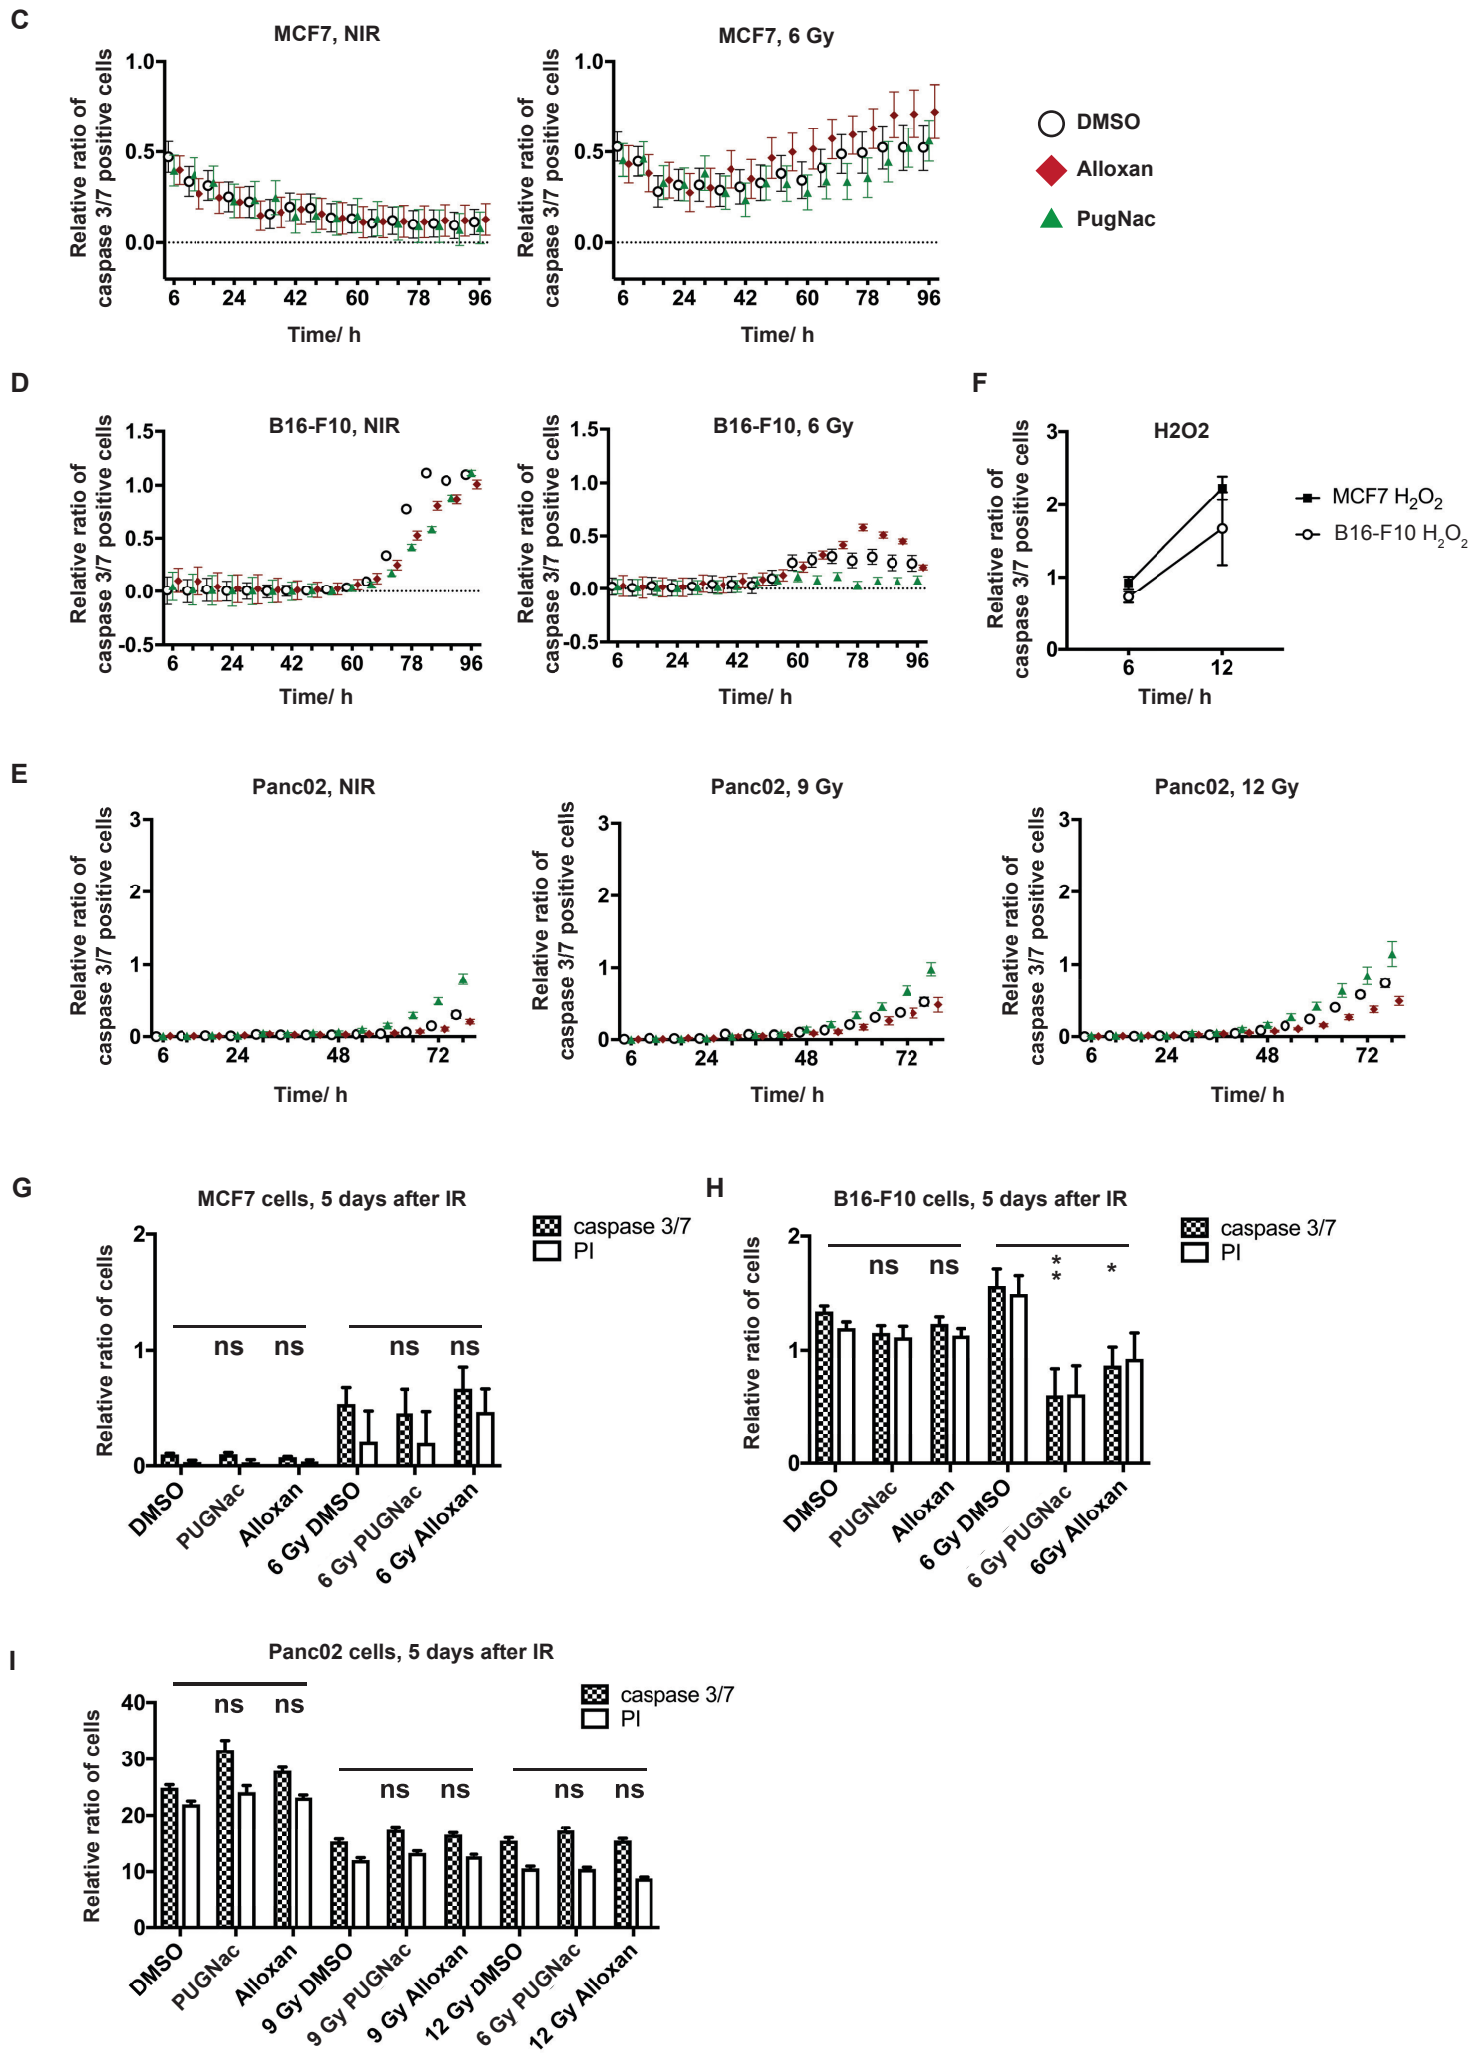

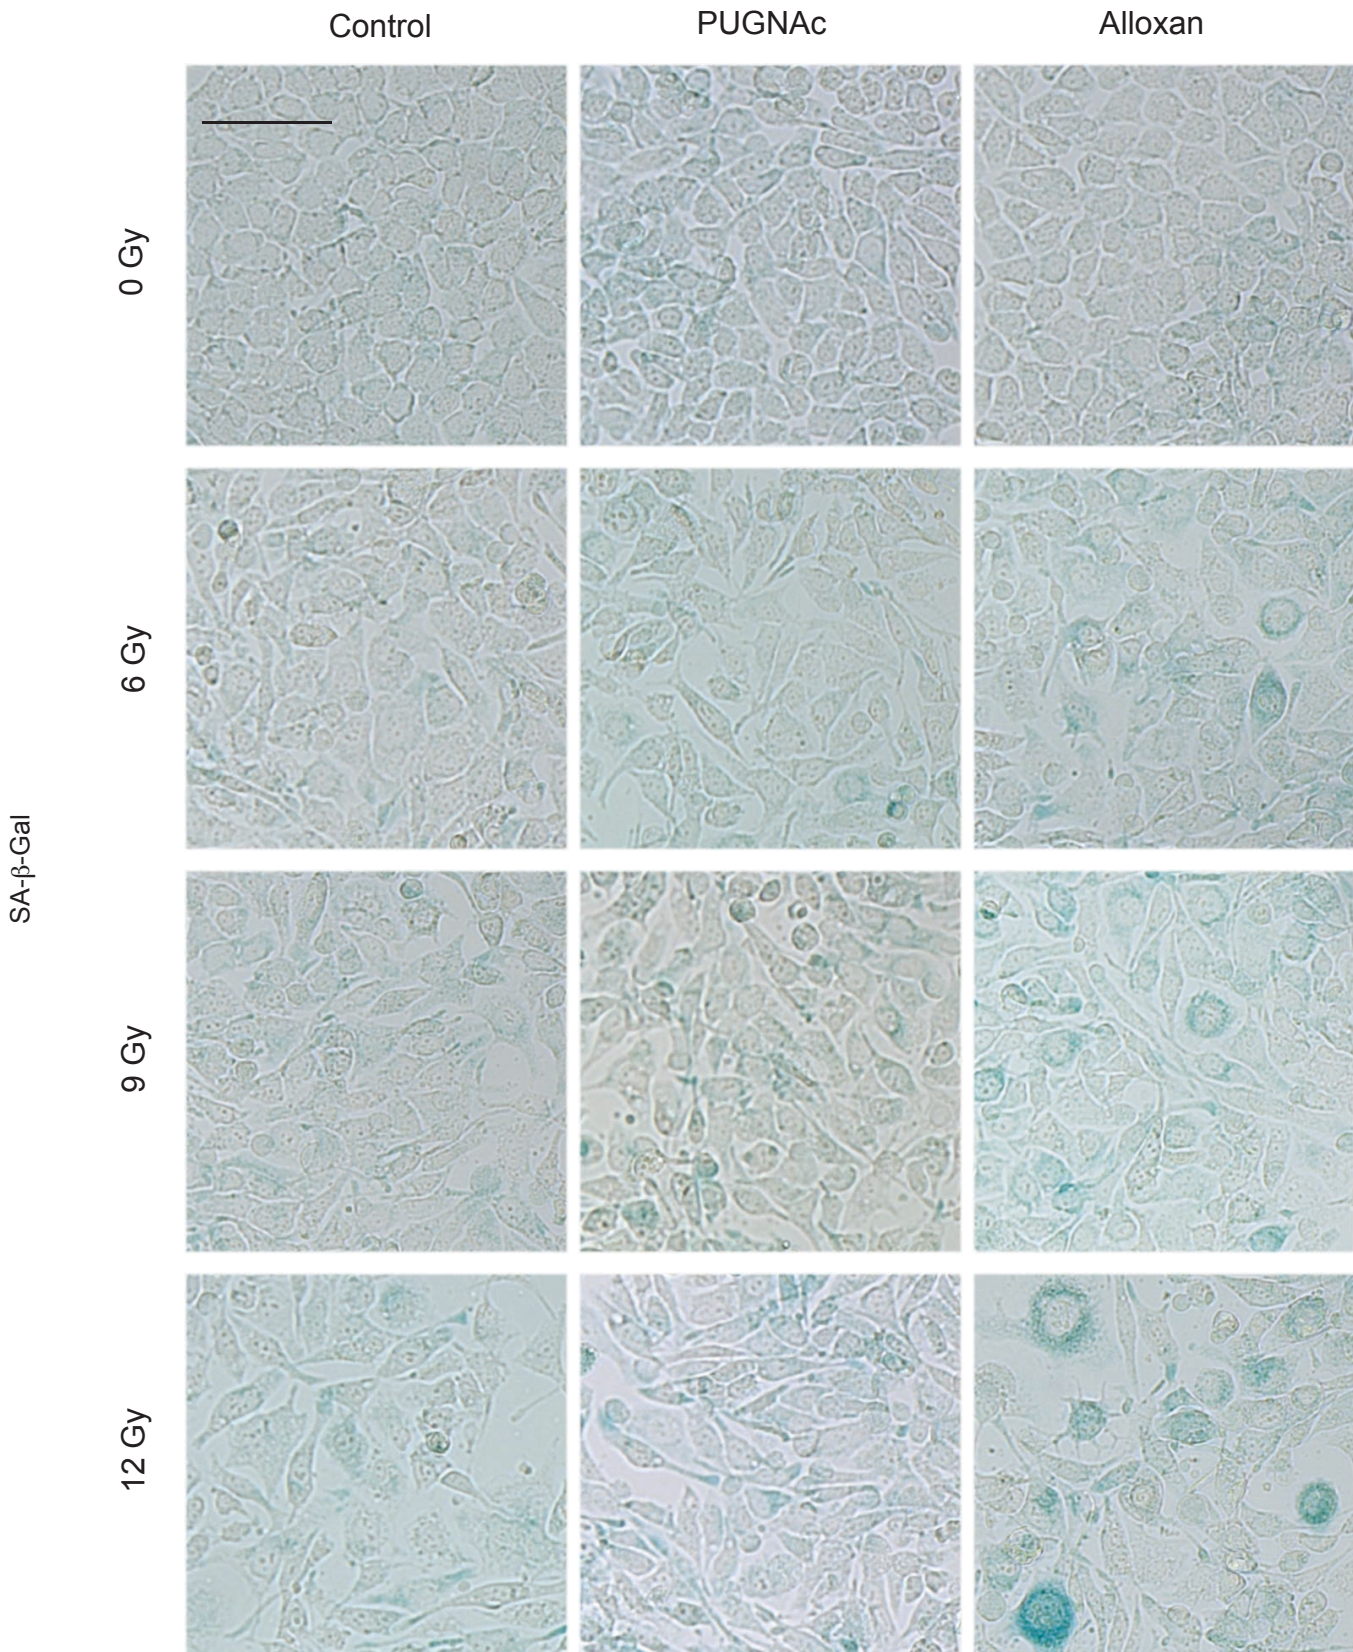

**A**

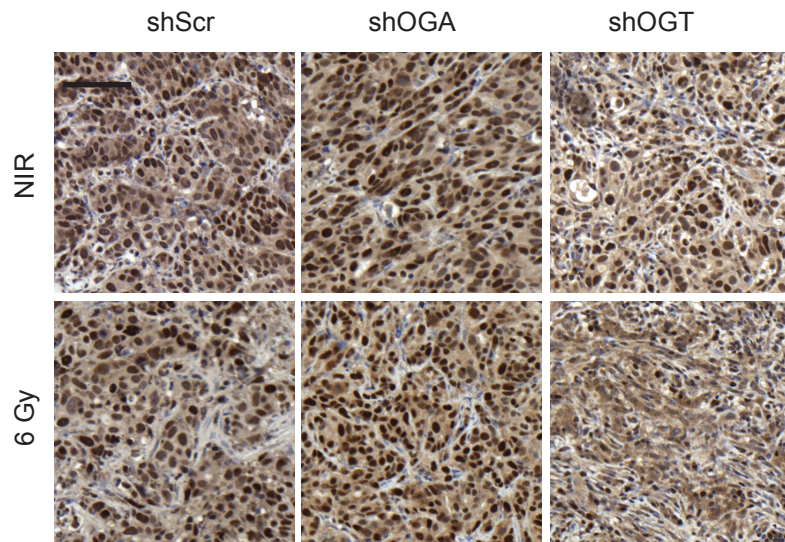

**B**

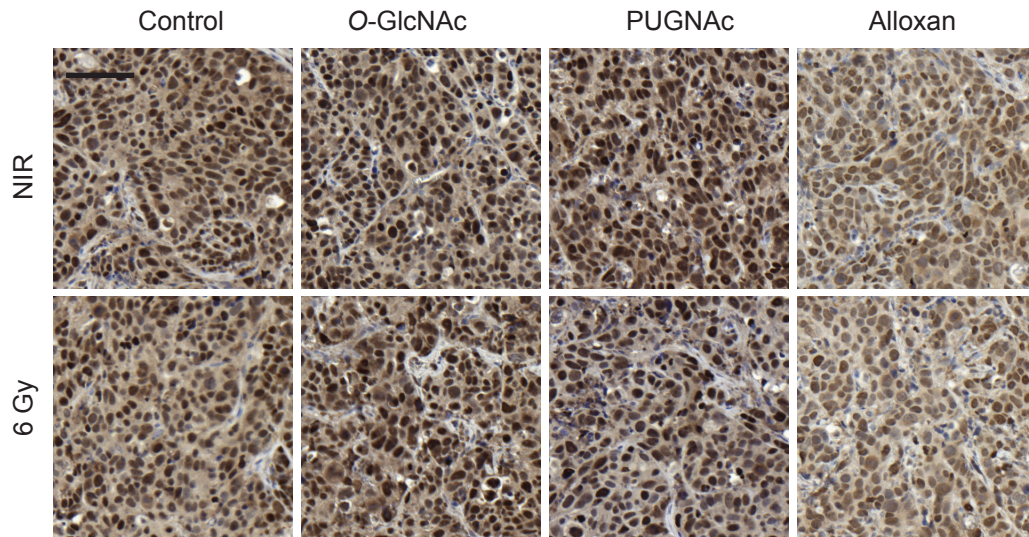

Supplement: NIHMS1524608-supplement-2.pdf [file NIHMS1524608-supplement-2.pdf]
